# Supplementary material
Source: PubMed Central journal article supplement (PMC10375941)

## Supplementary Figure 1L

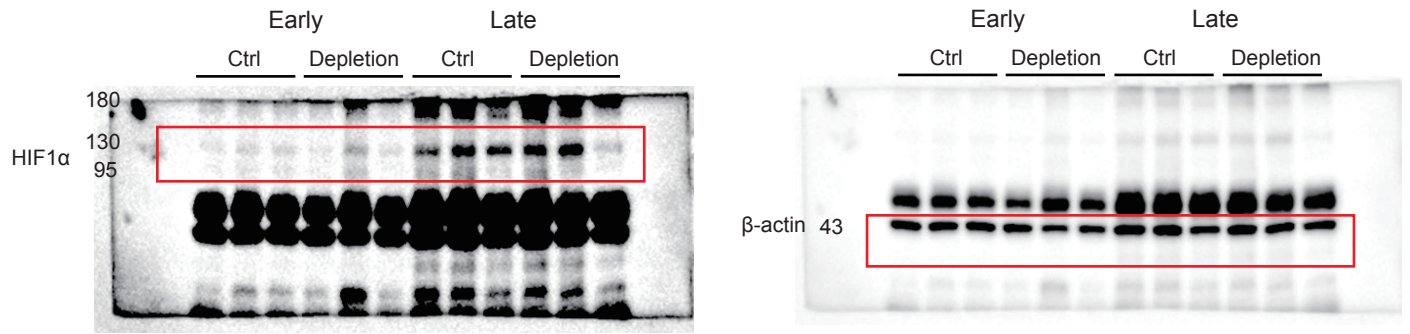

## Supplementary Figure 2G

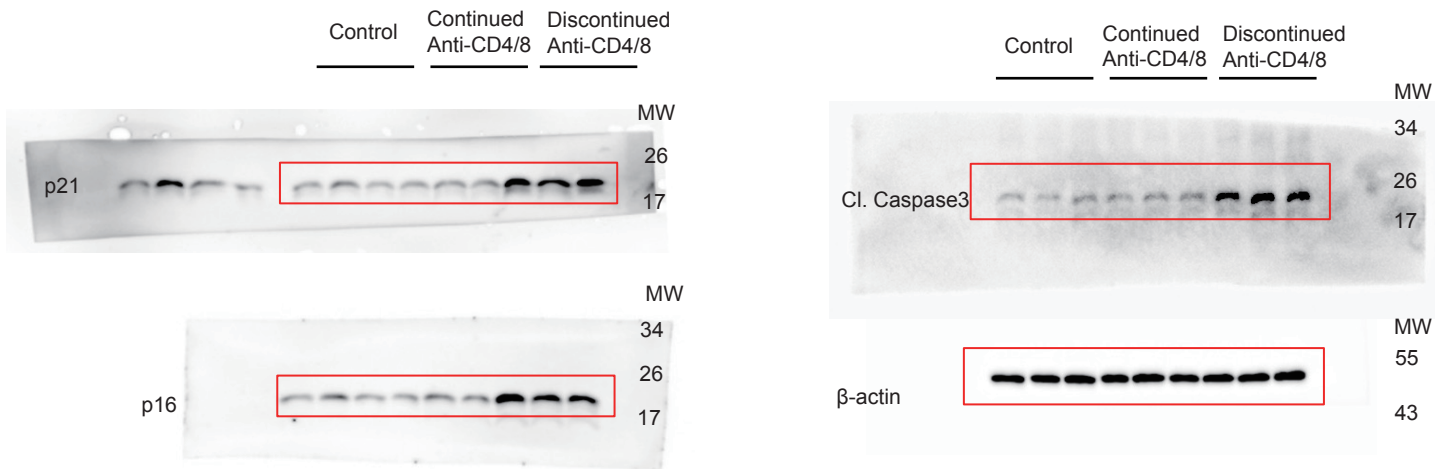

## Supplementary Figure 3A

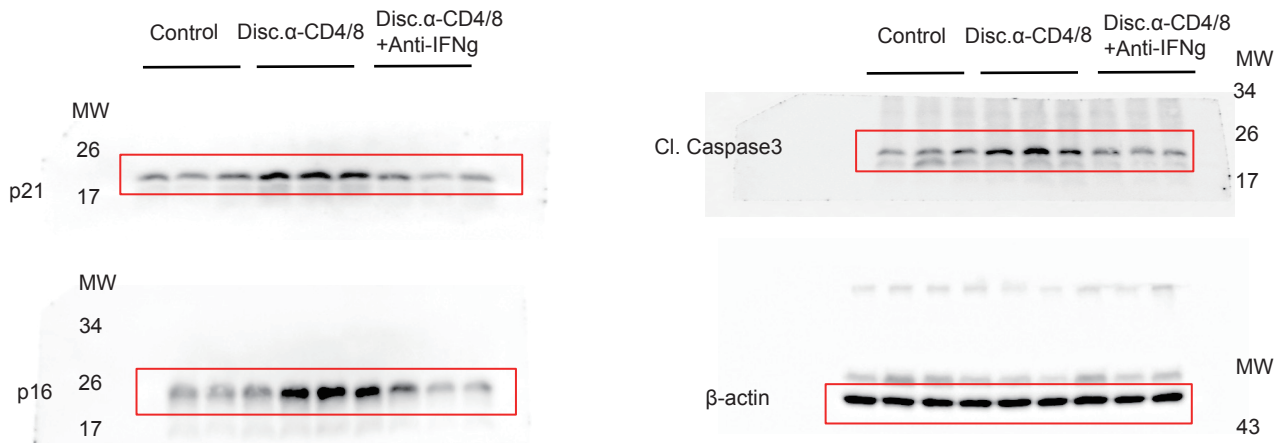

**Figure 5A**

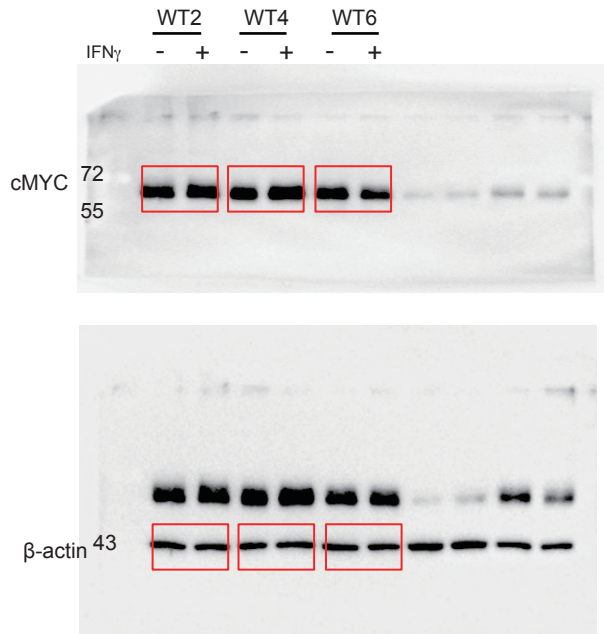

**Figure 5B**

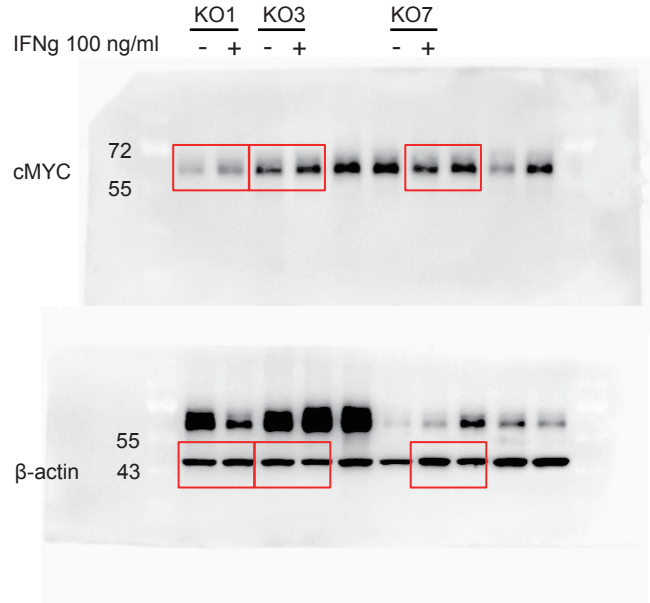

**Figure 5E**

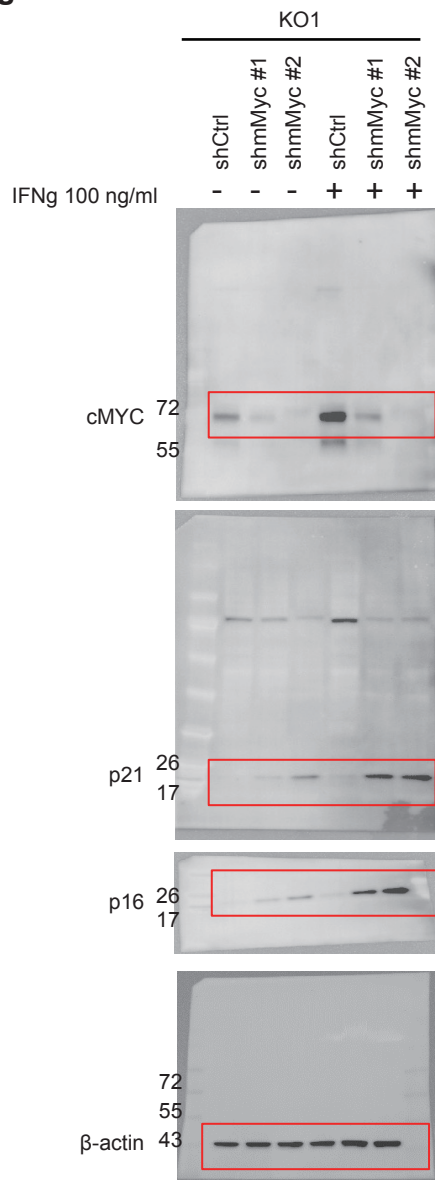

**Figure 5G**

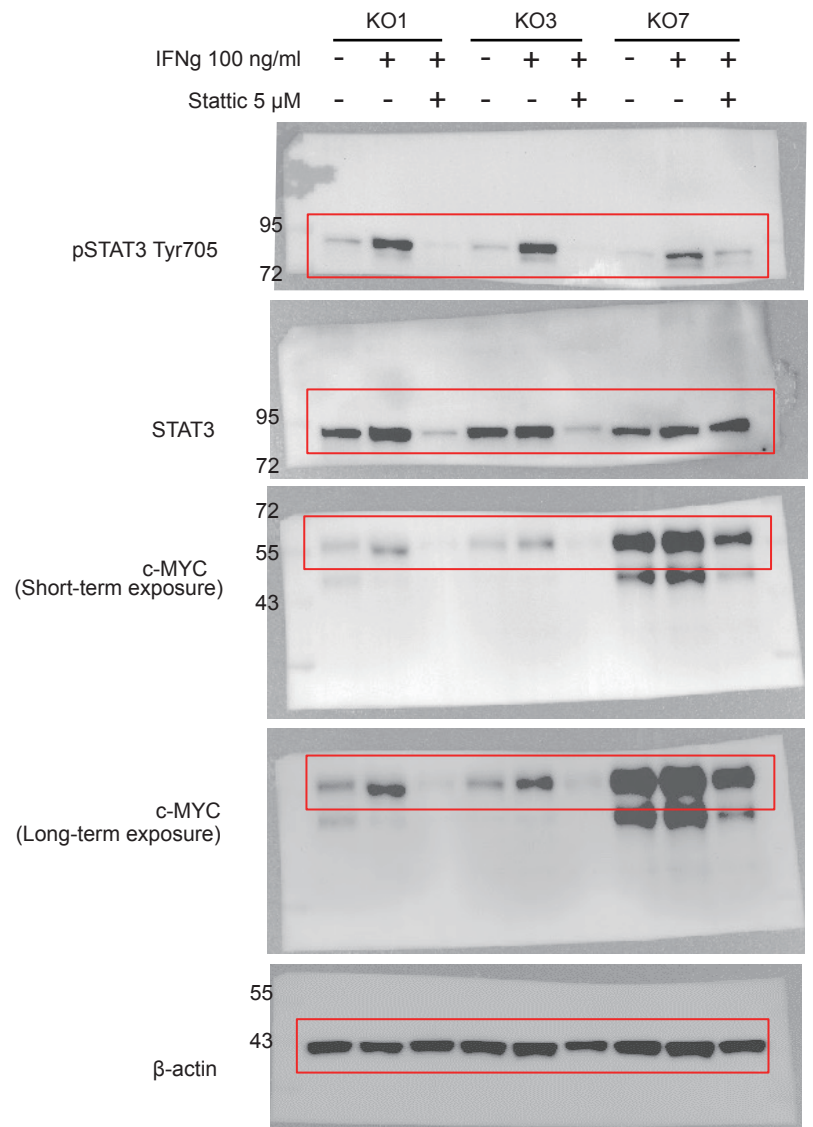



**Figure 5I**

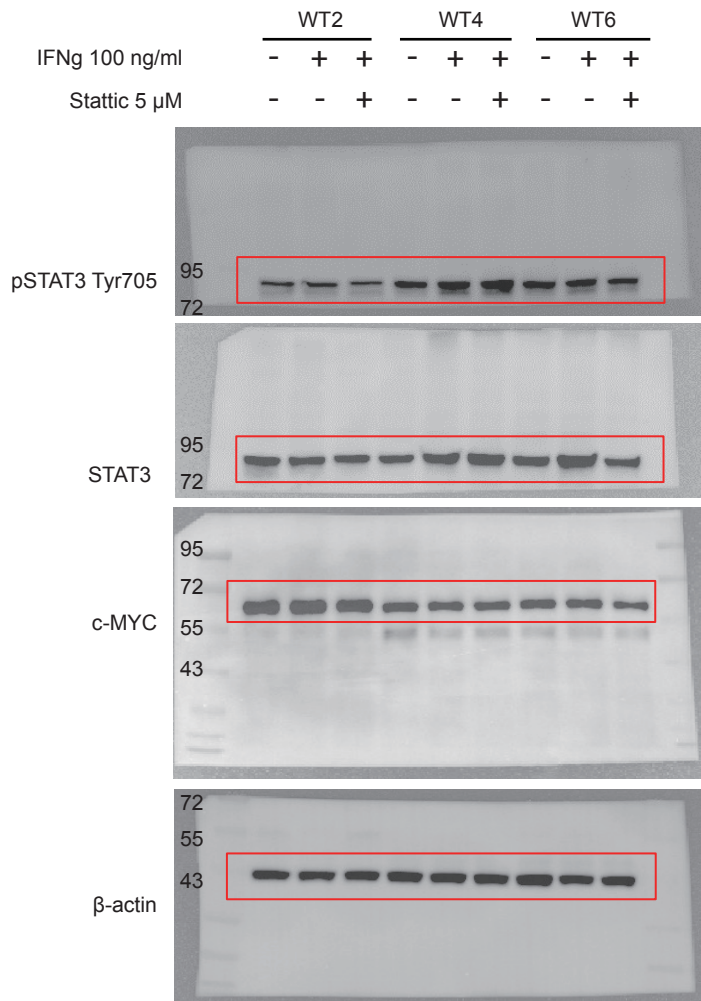

**Figure 5K**

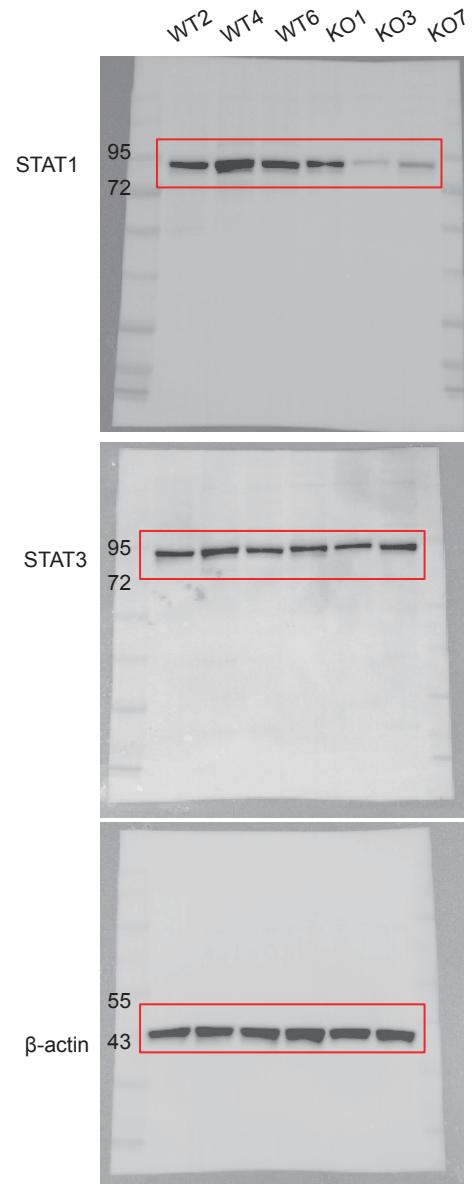

**Figure 5L**

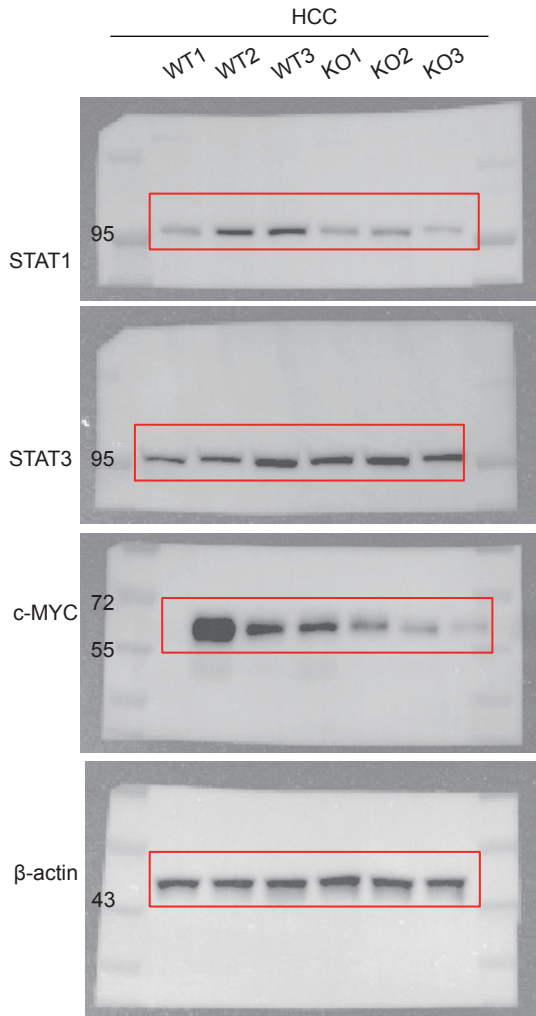

**Figure 5M**

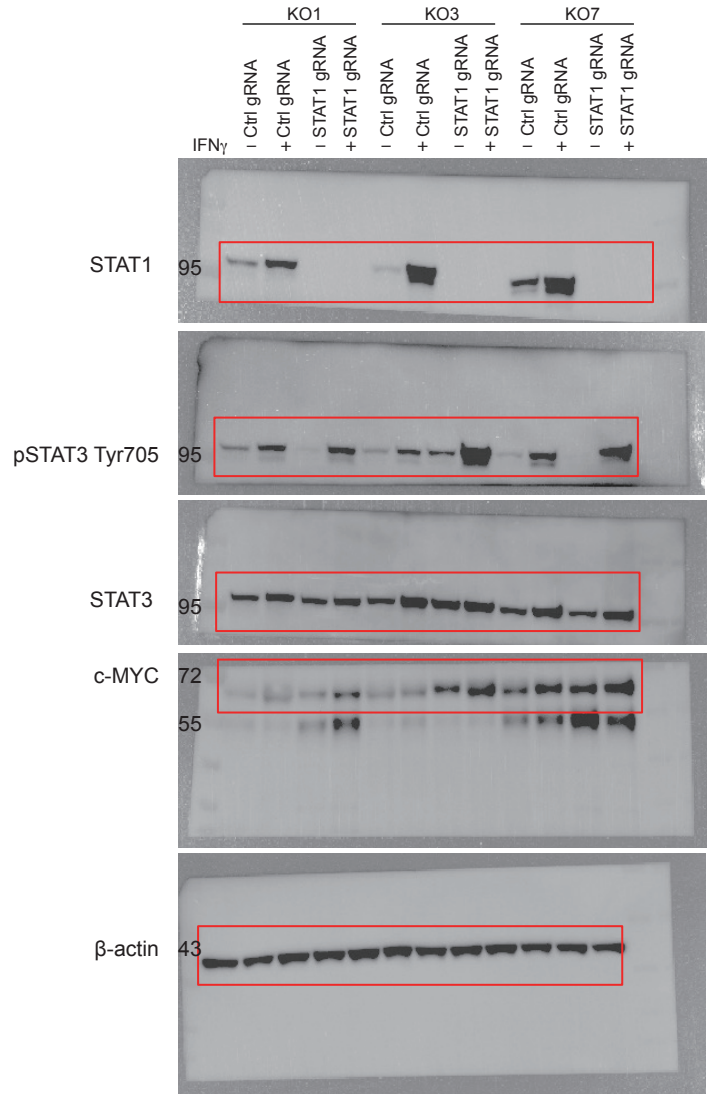

**Figure 5N**

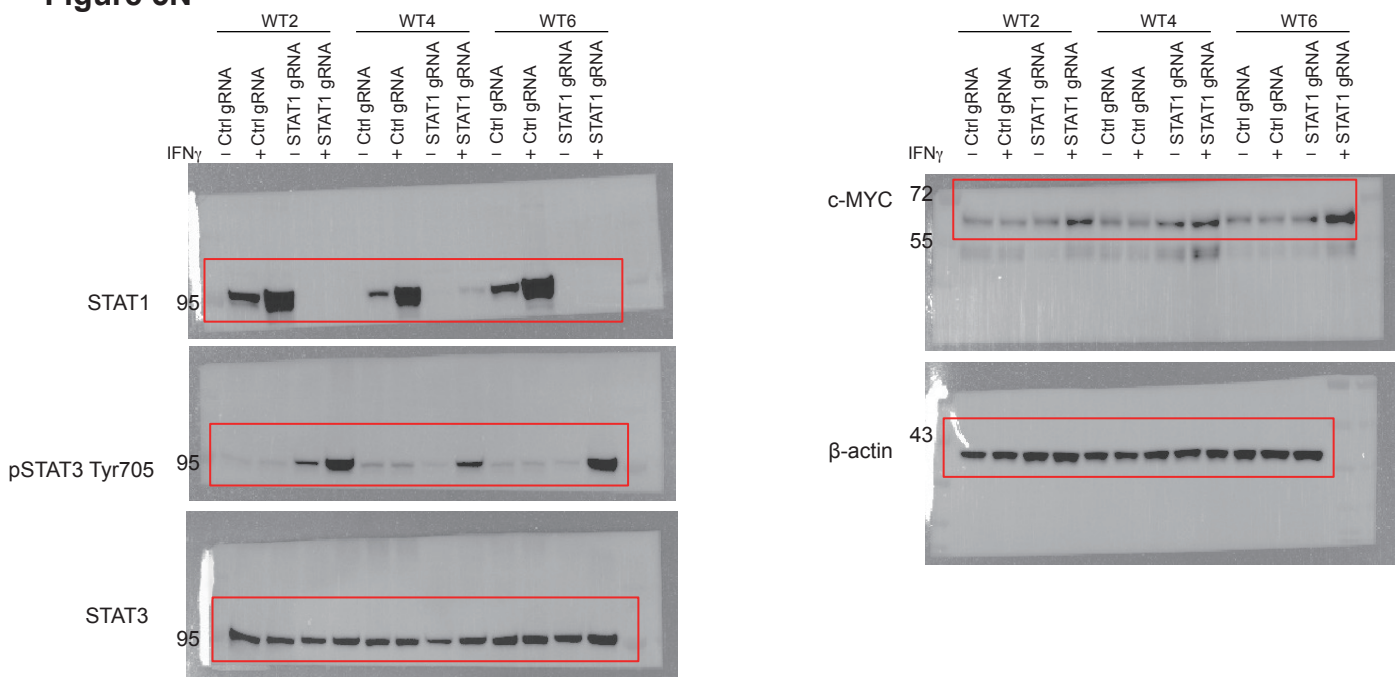

Supplementary Figure 5A

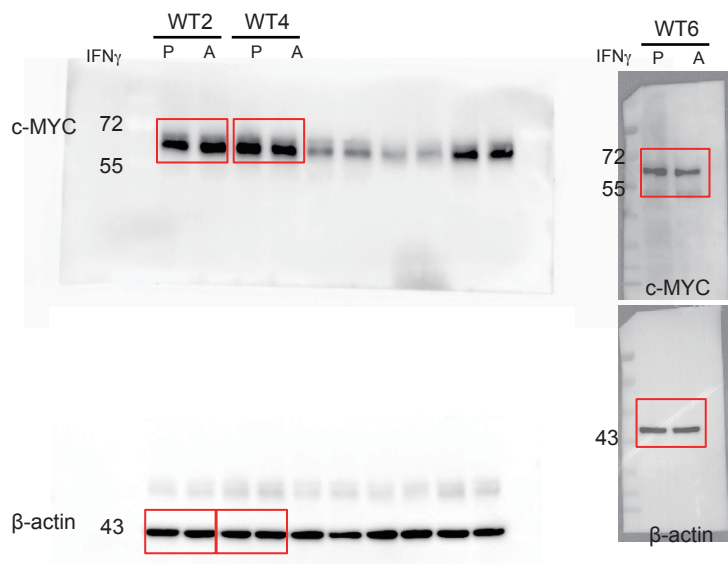

Supplementary Figure 5B

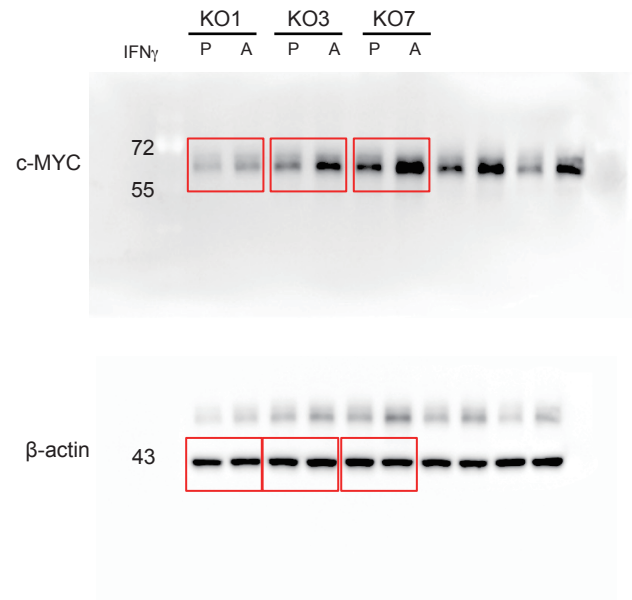

Supplementary Figure 5C

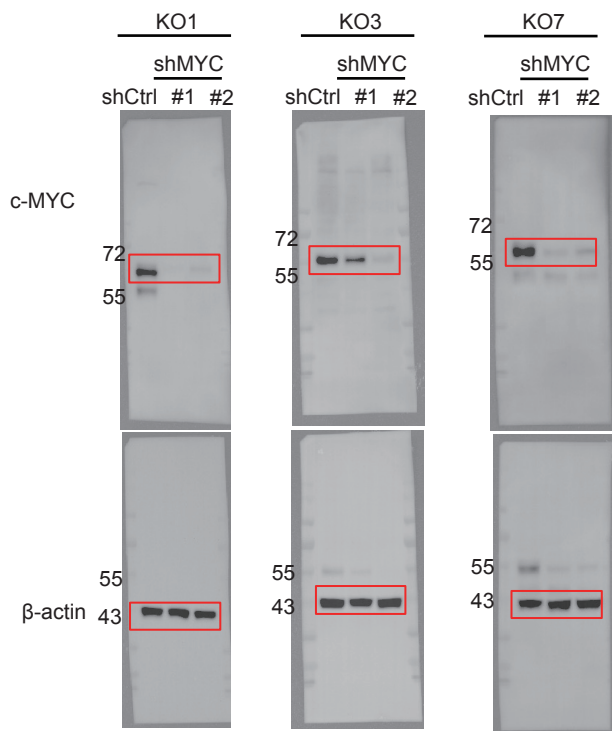



Supplementary Figure 5E

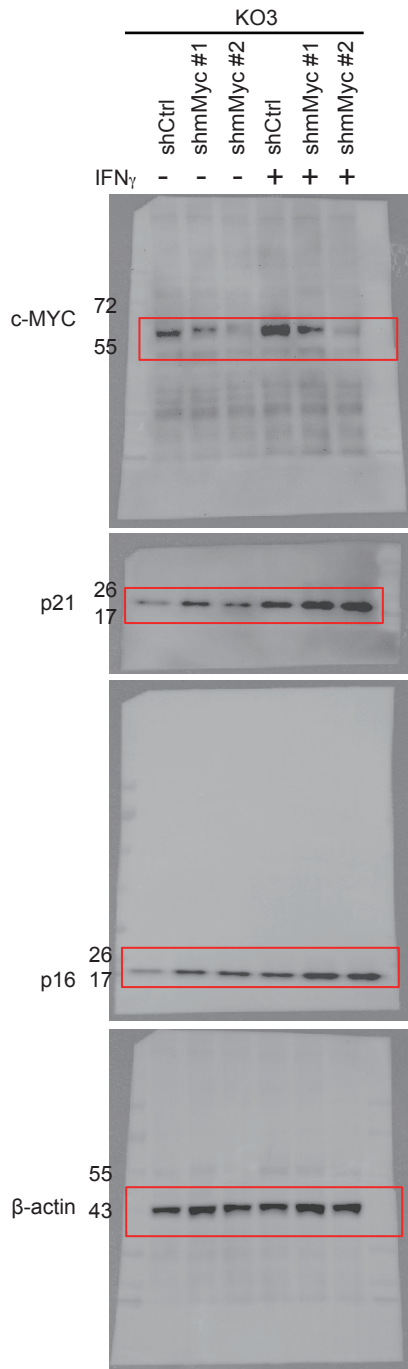

Supplementary Figure 5G

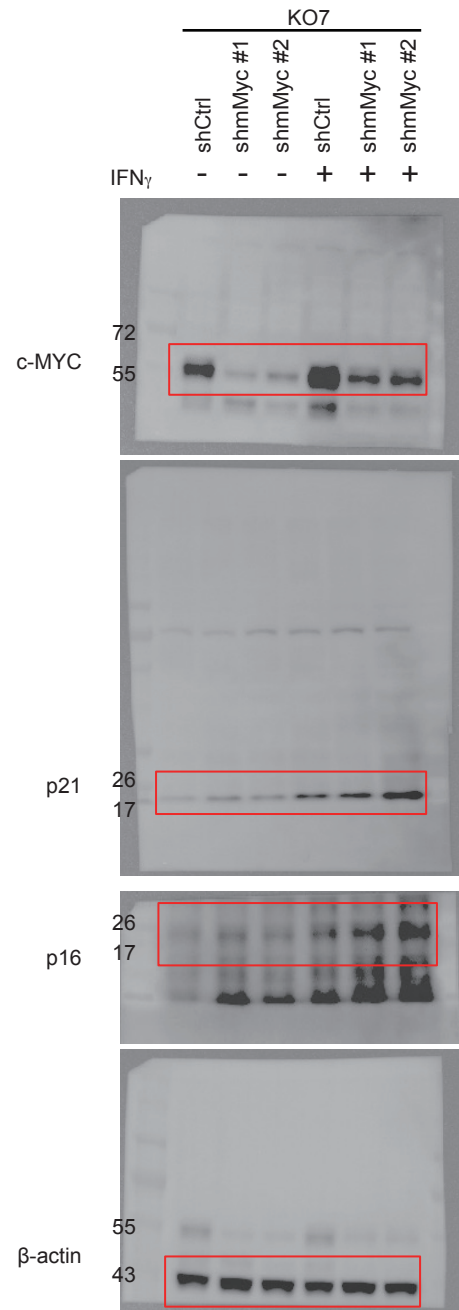

Supplementary Figure 5I

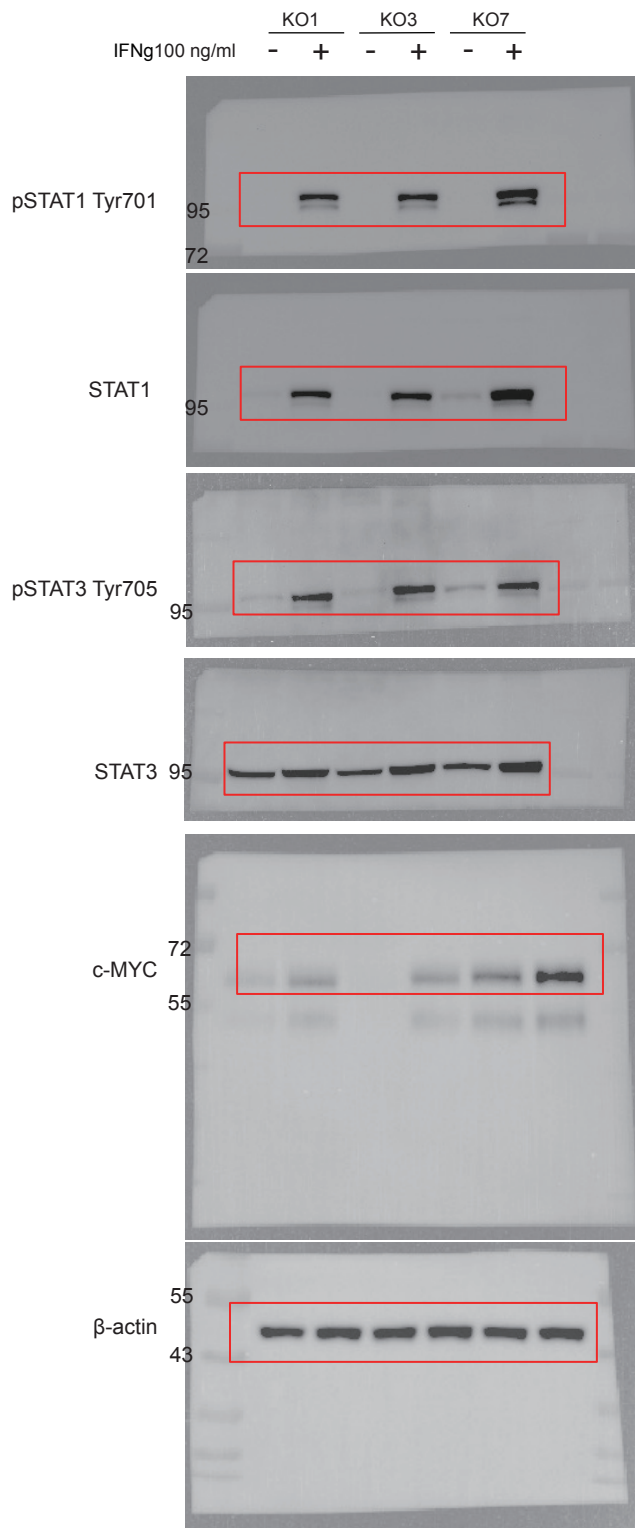

Supplementary Figure 5K

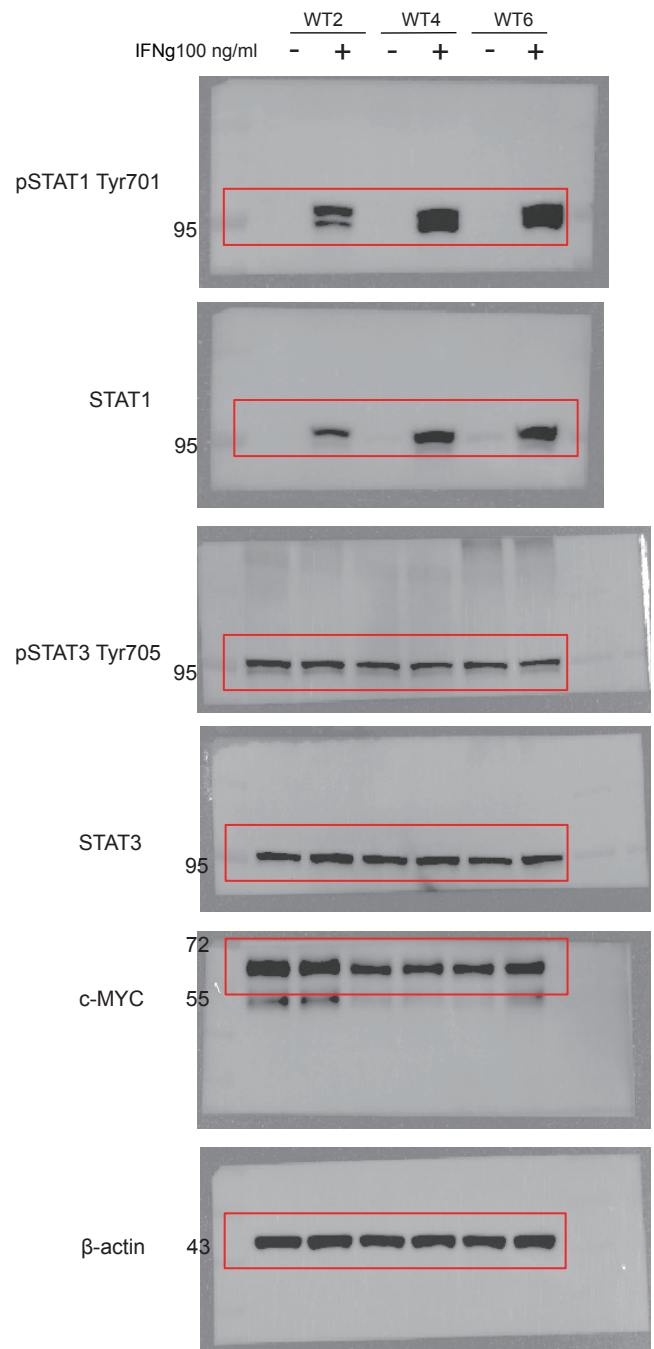

**Supplementary Figure 5M**

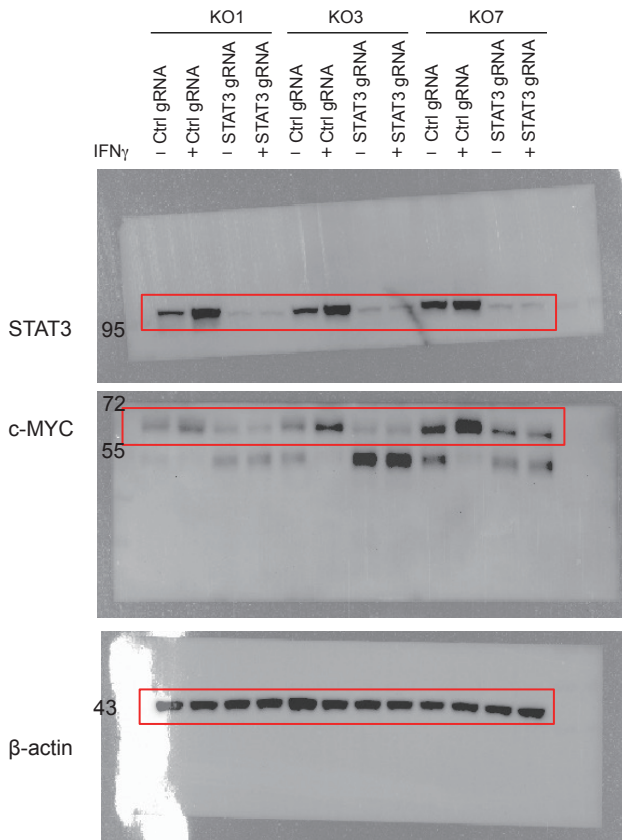

**Supplementary Figure 5O**

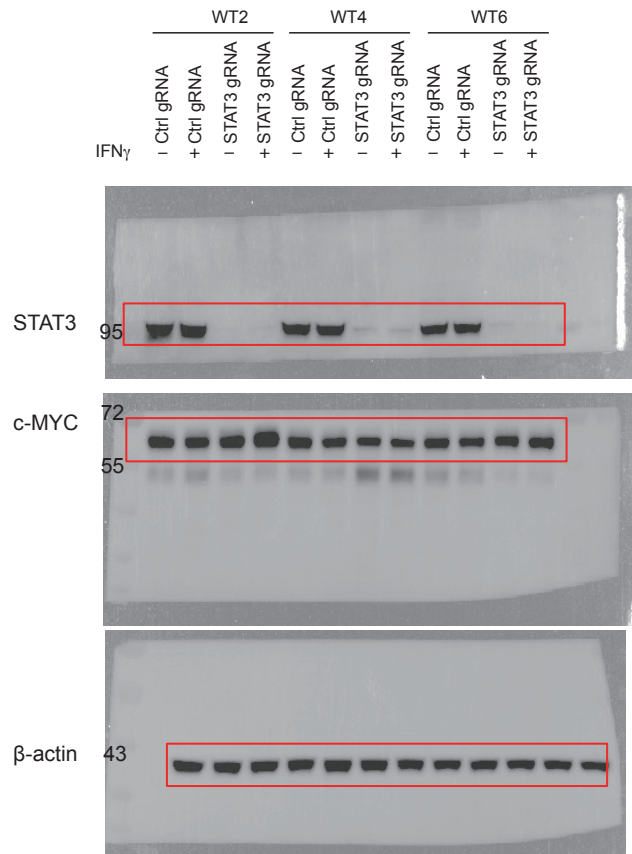

**Supplementary Figure 5Q**

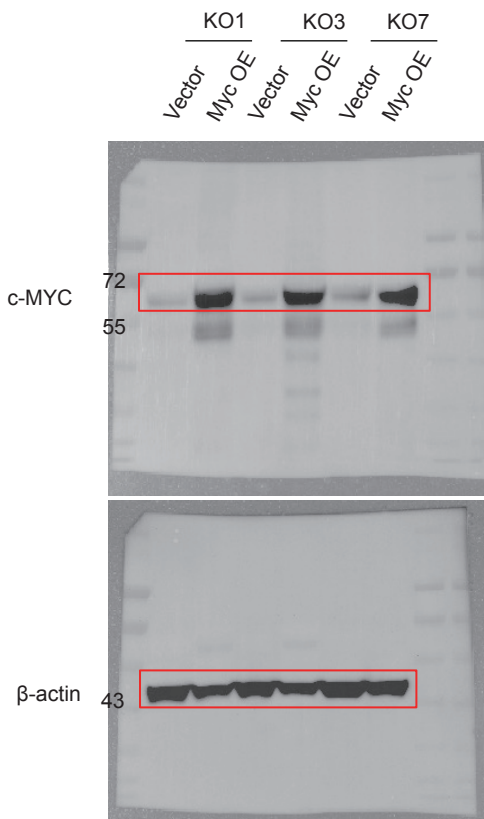

**Supplementary Figure 6K**

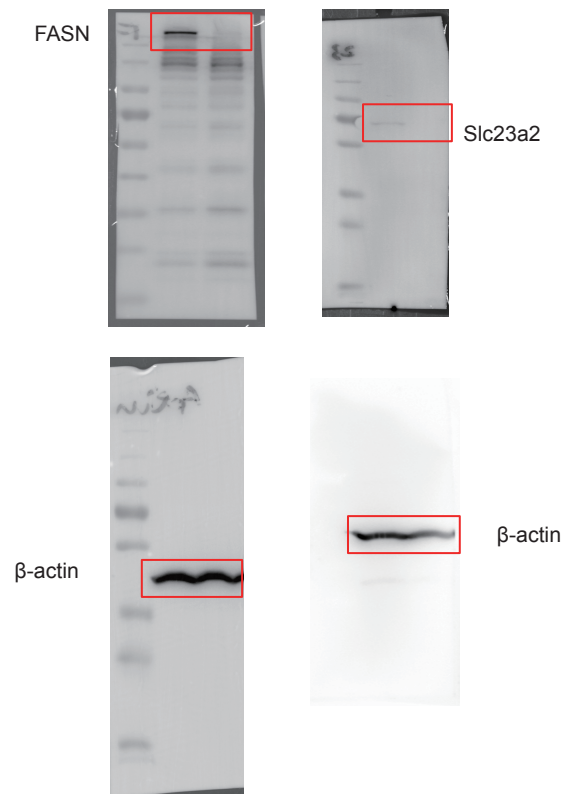

Supplement: NIHMS1910975-supplement-Data_S1_Uncropped_Blots.pdf [file NIHMS1910975-supplement-Data_S1_Uncropped_Blots.pdf]
